# Supplementary material for: Technical note: Evaporating water is different from bulk soil water in δ 2 H and δ 18 O and has implications for evaporation calculation
Source: Copernicus journal article supplement (doi:10.5194/hess-25-5399-2021), 2021-10-07
Supplement: Supplementary file 1 [file 2021-05-24-Data sets.xlsx]

## Sheet: 0-5cmBulkSoilWater
date	VWC(cm3cm-3)	SE	d2H(‰)	SE	d18O(‰)	SE
20160717	0.139116	0.02051	-36.0862	1.75501	-1.16965	0.635144
20160721	0.187702	0.00953085	-48.0225	3.16206	-4.06856	0.793587
20160724	0.120663	0.0103903	-37.7892	2.81459	-1.24284	0.874132
20160727	0.29739	0.00664118	-53.1665	1.7637	-5.16465	0.490168
20160803	0.144915	0.0107932	-47.3448	2.00799	-3.24894	0.711289
20160806	0.0916635	0.0027182	-39.8909	3.23975	-1.24195	0.86277
20160810	0.0927128	0.00372308	-43.1486	2.24735	-0.78573	0.421085
20160813	0.074615	0.00317802	-34.0029	3.31444	1.33882	0.496194
20160817	0.0713183	0.0244556	-40.1743	2.92568	-1.01866	0.150272
20160820	0.0542232	0.00769362	-38.0013	0.39021	1.1842	0.162265
20160823	0.0428266	0.00499943	-39.2128	2.81223	-0.269023	0.560292
20160829	0.239974	0.028181	15.4806	3.62174	-3.05825	0.418274
20160901	0.144336	0.0265819	14.5846	3.33611	-0.355696	0.650714
20160905	0.0969356	0.00252312	12.9274	3.53169	2.20072	0.969616
20160909	0.123602	0.00856436	1.39578	5.40346	0.59456	0.656851
20160913	0.0995148	0.0115376	2.18085	2.80229	0.828558	0.541516
20160916	0.0898637	0.00465734	-11.6133	2.33442	0.537901	0.444148
20160921	0.354455	0.00495994	-45.0016	1.64842	-6.28628	0.348295
20160925	0.314599	0.00566957	-37.867	1.25979	-4.46613	0.164332
20161001	0.256483	0.00236518	-24.8719	2.32678	-2.99455	0.43661

## Sheet: EvaporatingWater
date	d2H(‰)	SE	d18O(‰)	SE
20160722	-53.7618	0.844102	-6.11316	0.252524
20160723	-54.5884	1.90126	-5.34334	0.613573
20160724	-54.4092	1.17285	-5.39576	0.666332
20160731	-51.9291	0.431956	-4.06111	0.0544996
20160801	-59.9013	5.15494	-5.98456	0.414408
20160802	-61.8546	1.84494	-6.10814	0.171347
20160806	-50.8881	1.29804	-3.95705	0.265762
20160831	12.4354	3.44051	-3.88979	0.594196
20160903	15.3932	6.21905	-3.29662	0.583258
20160905	14.5787	1.01339	-1.47883	0.832446
20160907	8.74675	1.59531	-0.375738	0.43924
20160910	2.20124	1.76491	-0.643792	0.661694
20160913	5.03304	2.34329	-1.75369	0.218482
20160915	-8.48191	4.21508	-0.570745	0.439212
20160917	-8.19389	3.21249	-0.725631	0.518335
20160925	-50.2698	0.553192	-7.70596	0.177693

## Sheet: EvaporativeWaterLoss
date	2H(Bulk soil water)	SE	18O(Bulk soil water)	SE	2H(Evaporating water)	SE	18O(Evaporating water)	SE
20160727	0.142774	0.0196214	0.122473	0.0130614	N.A.	N.A.	N.A.	N.A.
20160803	0.205839	0.0222926	0.173899	0.0192327	N.A.	N.A.	N.A.	N.A.
20160806	0.288128	0.0363821	0.2294	0.023855	N.A.	N.A.	N.A.	N.A.
20160810	0.2501	0.0255192	0.243972	0.012027	N.A.	N.A.	N.A.	N.A.
20160813	0.35543	0.0382695	0.304265	0.014393	N.A.	N.A.	N.A.	N.A.
20160817	0.285021	0.0328636	0.235215	0.00415528	N.A.	N.A.	N.A.	N.A.
20160820	0.30963	0.00434203	0.294881	0.00447989	N.A.	N.A.	N.A.	N.A.
20160823	0.296336	0.0311732	0.254538	0.0152593	N.A.	N.A.	N.A.	N.A.
20160829	N.A.	N.A.	0.173873	0.0114904	N.A.	N.A.	0.155505	0.0102505
20160901	N.A.	N.A.	0.249664	0.0184562	N.A.	N.A.	0.222403	0.0163536
20160905	N.A.	N.A.	0.325252	0.0288656	N.A.	N.A.	0.288217	0.0253159
20160909	N.A.	N.A.	0.280204	0.0194227	N.A.	N.A.	0.247349	0.0169861
20160913	N.A.	N.A.	0.291556	0.0167495	N.A.	N.A.	0.254779	0.0144276
20160916	N.A.	N.A.	0.289975	0.0147378	N.A.	N.A.	0.249185	0.012362

## Sheet: PrecipitationIrrigation
date	d2H	SE	d18O	SE
20160711	-55.5931	0.220989	-8.1288	0.0683549
20160713	-53.5688	0.222566	-7.8925	0.0713621
20160718	-58.7793	0.20522	-7.51441	0.0382829
20160721	-35.3411	0.239357	-5.69804	0.176618
20160724	-62.9725	0.19944	-8.11212	0.0529008
20160725	-49.7124	0.220666	-6.67704	0.0906373
20160730	-77.7719	0.510894	-8.29375	0.0537945
20160801	-74.7338	0	-9.55406	0
20160912	-13.4659	0.405467	-0.950783	0.11977
20160914	-10.8729	0.0671039	-1.44353	0.0761314
20160920	-34.6275	0.255474	-6.01595	0.0905572
20160924	-43.2148	0.20115	-4.71083	0.0268201
20160928	-49.25	0.126105	-6.96628	0.0263915
20160826	49.8737	2.65848	-9.4003	0.0545154

## Sheet: 0-60cmSoilWater
date	depth	VWC(cm3cm-3)	SE	d2H(‰)	SE	d18O(‰)	SE	lc-excess	SE
20160717	2.5	0.118766	0.02051	-36.0862	1.75501	-1.16965	0.635144	-37.3712	3.23701
	7.5	0.263114	0.00323923	-38.7874	2.74968	-4.02518	0.704783	-17.7707	2.76683
	15	0.264419	0.00329253	-21.684	3.31181	-1.67232	0.248757	-19.0432	2.38933
	25	0.264085	0.00328089	-28.7627	3.5627	-3.26985	0.458123	-13.6452	1.88881
	35	0.250367	0.0128307	-42.5155	1.54019	-5.42455	0.203321	-10.5697	0.33293
	50	0.235061	0.00275882	-52.0514	1.98108	-6.81559	0.292454	-9.24166	0.310587
20160803	2.5	0.151554	0.0107932	-47.3448	2.00799	-3.24894	0.711289	-32.3906	3.59012
	7.5	0.236168	0.0140488	-48.1009	4.90303	-5.35535	0.731696	-16.6957	0.957833
	15	0.218042	0.00397567	-37.879	5.7828	-4.68461	1.00817	-11.7122	2.14817
	25	0.252061	0.00706224	-37.4969	5.43879	-4.58464	0.764213	-12.1109	0.610598
	35	0.264133	0.0090309	-44.1138	1.42152	-5.77006	0.388039	-9.46968	1.64864
	50	0.280588	0.0205389	-49.2572	1.38208	-6.49429	0.184876	-8.95683	1.11673
20160817	2.5	0.0814883	0.0244556	-40.1743	2.92568	-1.01866	0.150272	-42.6386	3.73536
	7.5	0.15074	0.00666302	-37.0464	1.00412	-2.52605	0.341925	-27.7379	2.80735
	15	0.173914	0.00526149	-35.5806	1.79442	-3.64131	0.494296	-17.562	2.5629
	25	0.184378	0.00927388	-36.5854	0.666249	-4.1944	0.412279	-14.2472	2.76184
	35	0.18126	0.00849084	-43.0359	1.60353	-5.34061	0.297528	-11.7457	1.55834
	50	0.18257	0.00735687	-52.2038	3.27916	-6.27118	0.768971	-13.6459	3.36529
20160901	2.5	0.139051	0.0265819	7.36443	3.88037	-1.24832	0.954762	N.A.	N.A.
	7.5	0.216602	0.0180224	-7.22479	2.03573	-4.47143	1.00884	N.A.	N.A.
	15	0.212039	0.0203999	-29.4027	4.54332	-4.5445	0.53656	N.A.	N.A.
	25	0.209038	0.00667807	-34.1477	0.582615	-4.47585	0.222176	N.A.	N.A.
	35	0.182642	0.00423101	-38.3762	1.07496	-4.78642	0.244432	N.A.	N.A.
	50	0.16752	0.00498618	-47.9275	1.7667	-6.17242	0.269636	N.A.	N.A.
20160916	2.5	0.0939646	0.00465734	-11.6133	2.33442	0.537901	0.444148	N.A.	N.A.
	7.5	0.163907	0.00425393	-9.51325	3.46165	-2.2334	0.13997	N.A.	N.A.
	15	0.193068	0.00376446	-21.8874	3.59638	-4.45812	0.373525	N.A.	N.A.
	25	0.209941	0.0091202	-28.8916	3.30508	-4.5982	0.459959	N.A.	N.A.
	35	0.194622	0.000651897	-35.3168	2.23425	-4.77062	0.40463	N.A.	N.A.
	50	0.179626	0.00165775	-45.8582	0.707563	-6.04853	0.264081	N.A.	N.A.
