# Supplementary material for: Technical note: Evaporating water is different from bulk soil water in δ 2 H and δ 18 O and has implications for evaporation calculation
Source: Copernicus journal article supplement (doi:10.5194/hess-25-5399-2021), 2021-10-07
Supplement: Supplementary file 1 [file hess-25-5399-2021-supplement.zip]

Archive with 3 entries (3 files):
- 2021-05-24-Data sets.xlsx
- 2021-05-24-Supplement File.docx
- hess-25-5399-2021-supplement-title-page.pdf
