# Supplementary material for: Technical note: Evaporating water is different from bulk soil water in δ 2 H and δ 18 O and has implications for evaporation calculation
Source: Copernicus journal article supplement (doi:10.5194/hess-25-5399-2021), 2021-10-07
Supplement: Supplementary file 1 [file hess-25-5399-2021-supplement.zip › hess-25-5399-2021-supplement-title-page.pdf]

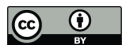

## *Supplement of*

# **Technical note: Evaporating water is different from bulk soil water in $\delta^2\text{H}$ and $\delta^{18}\text{O}$ and has implications for evaporation calculation**

**Hongxiu Wang et al.**

*Correspondence to:* Bingcheng Si ([bing.si@usask.ca](mailto:bing.si@usask.ca)) and Buli Cui ([cuibuli@163.com](mailto:cuibuli@163.com))

- [hess-25-5399-2021-supplement-title-page.pdf](#)
- [2021-05-24-Data sets.xlsx](#)
- [2021-05-24-Supplement File.docx](#)

The copyright of individual parts of the supplement might differ from the article licence.
